# Evaluation of Dietary Effects on Hepatic Lipids in High Fat and Placebo Diet Fed Rats by *In Vivo* MRS and LC-MS Techniques

Jadegoud Yaligar<sup>1</sup>, Venkatesh Gopalan<sup>1</sup>, Ong Wee Kiat<sup>1</sup>, Shigeki Sugii<sup>1</sup>, Guanghou Shui<sup>2</sup>, Buu Duyen Lam<sup>3</sup>, Christiani Jeyakumar Henry<sup>4</sup>, Markus R. Wenk<sup>3</sup>, E. Shyong Tai<sup>5</sup>, S. Sendhil Velan<sup>1,4\*</sup>

**1** Laboratory of Molecular Imaging, Singapore Bioimaging Consortium, A\*STAR, Singapore, Singapore, **2** Life Sciences Institute, National University of Singapore, Singapore, Singapore, **3** Department of Biochemistry and Department of Biological Sciences, National University of Singapore, Singapore, Singapore, **4** Singapore Institute for Clinical Sciences, A\*STAR, Singapore, Singapore, **5** Department of Medicine, National University of Singapore, Singapore, Singapore

## Abstract

**Background & Aims:** Dietary saturated fatty acids contribute to the development of fatty liver and have pathogenic link to systemic inflammation. We investigated the effects of dietary fat towards the pathogenesis of non-alcoholic fatty liver disease by longitudinal *in vivo* magnetic resonance spectroscopy (MRS) and *in vitro* liquid chromatography coupled with mass spectrometry (LC-MS).

**Methods:** All measurements were performed on rats fed with high fat diet (HFD) and chow diet for twenty four weeks. Longitudinal MRS measurements were performed at the 12<sup>th</sup>, 18<sup>th</sup> and 24<sup>th</sup> weeks. Liver tissues were analyzed by LC-MS, histology and gene transcription studies after terminal *in vivo* experiments.

**Results:** Liver fat content of HFD rats for all ages was significantly ( $P < 0.05$ ) higher compared to their respective chow diet fed rats. Unsaturation indices estimated from MRS and LC-MS data of chow diet fed rats were significantly higher ( $P < 0.05$ ) than HFD fed rats. The concentration of triglycerides 48:1, 48:2, 50:1, 50:2, 50:3, 52:1, 52:2, 52:3, 54:3 and 54:2 was significantly higher ( $P < 0.05$ ) in HFD rats. The concentration for some polyunsaturated triglycerides 54:7, 56:8, 56:7, 58:11, 58:10, 58:9, 58:8 and 60:10 was significantly higher ( $P < 0.05$ ) in chow diet fed rats compared to HFD rats. Lysophospholipid concentrations including LPC and LPE were higher in HFD rats at 24 weeks indicating the increased risk of diabetes. The expression of CD36, PPAR $\alpha$ , SCD1, SREBF1 and UCP2 were significantly upregulated in HFD rats.

**Conclusions:** We demonstrated the early changes in saturated and unsaturated lipid composition in fatty liver by *in vivo* MRS and *ex vivo* LC-MS. The higher LPC concentration in HFD rats indicated a higher risk of developing diabetes. Early metabolic perturbations causing changes in lipid composition can be evaluated by the unsaturation index and correlated to the non alcoholic fatty liver disease.

**Citation:** Yaligar J, Gopalan V, Kiat OW, Sugii S, Shui G, et al. (2014) Evaluation of Dietary Effects on Hepatic Lipids in High Fat and Placebo Diet Fed Rats by *In Vivo* MRS and LC-MS Techniques. PLoS ONE 9(3): e91436. doi:10.1371/journal.pone.0091436

**Editor:** Hervé Guillou, INRA, France

**Received:** October 1, 2013; **Accepted:** February 12, 2014; **Published:** March 17, 2014

**Copyright:** © 2014 Yaligar et al. This is an open-access article distributed under the terms of the Creative Commons Attribution License, which permits unrestricted use, distribution, and reproduction in any medium, provided the original author and source are credited.

**Funding:** This research was supported by the intramural funding from Singapore Bioimaging Consortium, A\*STAR, Singapore & National University of Singapore, Singapore. The funders had no role in study design, data collection and analysis, decision to publish, or preparation of the manuscript.

**Competing Interests:** The authors have declared that no competing interests exist.

\* E-mail: Sendhil\_Velan@sbic.a-star.edu.sg

## Introduction

Non alcoholic fatty liver disease (NAFLD) results from an imbalance between lipid availability (from circulating lipid uptake or de novo lipogenesis) and lipid disposal (via fatty acid oxidation or triglyceride-rich lipoprotein secretion). The accumulated lipids induce oxidative stress, resulting in production of cytokines and reactive oxygen species which in turn activate apoptosis thereby initiating a sequence of disease events from steatosis to nonalcoholic steatohepatitis (NASH), which progress into fibrosis and cirrhosis [1,2,3,4,5]. Hepatic steatosis causes insulin resistance which may act as pathogenic link between obesity and its metabolic complications [6,7]. Many patients suffering from metabolic syndrome involving obesity, dyslipidemia, hypertension,

insulin-resistant type-2 diabetes mellitus and atherosclerotic cardiovascular disease are associated with NAFLD [1,2,3,4,5].

The estimation of saturated and unsaturated lipids during the transition of normal liver to NAFLD provides information on early biochemical changes and may be utilized to evaluate response during interventions including exercise and drugs. Indeed, the composition of the fatty acids (FA, the building blocks for triglyceride) in the triglycerides (TG) is suspected to contribute to the pathogenesis of NAFLD. In particular, saturated fatty acids play a prominent role in the progression of obesity and diabetes [8,9,10,11]. Diets with high saturated fatty acids are associated with insulin resistance and NAFLD [12]. Saturated fatty acids are poorly oxidized compared to unsaturated fat and hence are more likely to accumulate in insulin resistant tissues [13]. Saturated

lipids are also the most inhibitory lipids on insulin sensitivity [14,15]. The degree of unsaturation of the FAs modulate the metabolic signaling and energy metabolism [16]. As such, the assessment of both the ratio of saturated and unsaturated fat in the liver, as well as the quantity of fat in the liver represent an important aspect in the pathogenesis of chronic liver disease and metabolic disease.

Magnetic resonance spectroscopy (MRS) is a non-invasive method for investigating metabolism allowing longitudinal studies on humans and rodents. It estimates both the total fat content and unsaturation index. However, its main limitation deals with the impossibility of estimating the individual lipid composition. On another hand, liquid chromatography with mass spectrometry (LC-MS) permits analysis of individual saturated and unsaturated lipids.

In this study, we used *in vivo* MRS to evaluate the longitudinal changes in liver fat content and unsaturation, on rodents fed with a high-fat diet (HFD). HFD is a significant source of fatty acids taken up by the liver [17]. We identified the specific lipid species that are altered in liver of HFD fed animals due to insulin resistance and fatty liver conditions predisposed to diabetes.

## Materials and Methods

### Animals and Animal Diet

All animal experiments were approved by the institutional animal care and use committee of the biological resource center, A\*STAR, Singapore. Male F344 rats (CLEA Japan, Inc. Tokyo, Japan) were received at 4 weeks of age, placed in individual cages, and randomly assigned to chow diet ( $n=8$ ) and HFD groups ( $n=8$ ). The animals were fed with their respective diets from the 5<sup>th</sup> week until the completion of the study (24<sup>th</sup> week). The FA composition of the HFD (Research Diets, New Brunswick, New Jersey, USA) was 62.4% saturated fat, 30.7% monounsaturated fat, 6.9% polyunsaturated fat.

### Biochemical Measurements

We measured plasma triglyceride, glucose, cholesterol and insulin levels at 12, 18 and 24 weeks of age. All the animals were fasted for 13 hours before blood collection. Bleeding was performed from the lateral tail vein using a rodent restrainer. Plasma glucose, cholesterol and triglyceride were evaluated by enzymatic colorimetric method using hexokinase, cholesterol esterase, cholesterol oxidase and fossati steps respectively (Quest Lab Pvt. Ltd Singapore). Plasma insulin was measured by using an ultra-sensitive ELISA kit (Crystal Chem Inc., Illinois, USA). An oral glucose tolerance test (OGTT) was performed at week 18 after an overnight fasting. Glucose ( $2 \text{ g kg}^{-1}$ ) was administered to rats by oral gavage injection and blood samples were collected from the tail vein at 0, 10, 30, 60 and 120 min. The total area under the glucose curve was determined from time 0 to 120 min (AUC 0–120 min) after glucose administration as described in our earlier work [18].

### *In vivo* MR Imaging and Spectroscopy

All animals were subjected to magnetic resonance imaging (MRI) and localized MRS. Prior to *in vivo* experiments, animals were initially anesthetized with 3% isoflurane in a dedicated chamber. During the course of MRS experiments, isoflurane levels were reduced to 1.5–2.0% in combination with medical air and medical oxygen. *In vivo* imaging and spectroscopy were performed using a 7 T Bruker ClinScan (Siemens VB15) MRI/MRS scanner equipped with a 72 mm volume resonator for RF transmit and 20 mm receive only surface coil. Rats were

positioned prone on the surface coil with the liver on top of the coil. The respiratory rate and body temperature were monitored using physiological monitoring system (ML880 16/30 power lab system, AD Instruments, Spechbach, Germany). The temperature probe was placed in the rectum of the rat and body temperature was maintained at 37°C by circulating hot water through a rat cradle on which the animal was resting. *In vivo* measurements were performed on animals in both the chow diet group and HFD group at 12, 18 and 24 weeks of age. Volume localized point resolved spectroscopy sequence (PRESS) with water suppression experiments were performed on a  $4 \times 4 \times 4 \text{ mm}^3$  voxel within the liver using TR = 4000 ms, TE = 13 ms, 128 averages, and 2048 complex points with a spectral width of 3500 Hz. A respiratory triggered gating module was incorporated into the PRESS sequence with a trigger delay of 20 ms and an animal breathing stabilized at 60–65 cycles per minute. Water unsuppressed spectra were acquired under identical conditions with similar parameters but only 4 averages. Lipid estimates were corrected for  $T_2$  relaxation. Fat content was estimated by the ratio of n-methylene signal (1.30 ppm) to the sum of n-methylene and water signals. An unsaturation index was estimated using the ratio of olefinic signal (5.30 ppm) to the sum of olefinic, methylenes (1.30 ppm and 2.06 ppm) and methyl signals (0.90 ppm) [19].

### Liquid Chromatography Coupled with Mass Spectrometry (LC-MS)

Animals were sacrificed at the 24<sup>th</sup> week just after the final *in vivo* MR experiments. The liver tissues were snap frozen in liquid nitrogen. Lipids were extracted and quantified using methodology as described in our earlier work [20,21,22,23]. About 20–30 mg of liver tissue was homogenized in 900  $\mu\text{L}$  of chloroform/methanol, 1/2, v/v (Merck Pte. Ltd., Singapore) and incubated on a vacuum chamber in a dark room for 1 h with agitation. After incubation, 0.3 mL of chloroform was added to the homogenate, followed by 0.4 mL of ice-cold water. The homogenate was then vortexed for 30 s followed by centrifugation for 2 min at 9000 rpm. The bottom organic phase was carefully transferred to an empty tube and 0.5 mL of ice-cold chloroform was added and re-extracted to collect the residual lipids fractions. The two organic extracts were then combined and dried under nitrogen. Individual classes of polar lipids were separated using an Agilent 1200 HPLC system before introduction into a 3200 Q-Trap mass spectrometer (Applied Biosystems) with HPLC conditions: Luna 3-mm silica column (i.d. 150 $\times$ 2.0 mm), mobile phase A (chloroform:methanol:ammonium hydroxide, 89.5:10:0.5), mobile phase B (chloroform:methanol:ammonium hydroxide:water, 55:39:0.5:5.5); flow rate 300  $\mu\text{L min}^{-1}$ ; 5% B for 3 min, then linear increase of B up to 30% in 24 min, follow by 5 min under these conditions, and then linear change to 70% B in 5 min. Mass spectrometry was recorded under both positive and negative electron-spray ionization (ESI) modes depending on the fraction [21] (conditions: Turbo Spray source voltage, 5000 and - 4500 V for positive and negative modes, respectively) with EMS scan type (conditions: source temperature, 300°C; GS<sub>1</sub>: 40.00, GS<sub>2</sub>: 40.00, curtain gas: 25.). Various lipid fractions including phosphatidylcholine (PC), sphingomyelin (SM), ceramide (Cer) and Glucocyl-ceramide (GluCer) were acquired in the positive ESI mode while phosphatidylethanolamine (PE), phosphatidylinositol (PI), phosphatidylserine (PS), phosphatidylglycerol (PG), phosphatidic acids (PA) and gangliosides mannoside 3 (GM3) were measured in the negative ESI mode [21]. Individual lipid species were quantified by comparison with spiked internal standards PC-14:0/14:0, PE-14:0-14:0, PS- 14:0/14:0, PA-17:0/17:0, PG-14:0/14:0, d31-PI18:1/16:0, C17-LPC, C17-LPA, C17-LPS, C17-Cer, C8-GluCer, C12-SM and C17-ganglioside GM3

obtained from Avanti polar lipids (Alabaster, AL, USA). The molar fractions of individual lipid species and each lipid class were normalized by summation of all polar lipid species. TGs were separated from polar lipids on an Agilent Zorbax Eclipse XDB-C18 column (i.d. 150×4.66 mm), with chloroform:methanol:0.1 M ammonium acetate (100:100:4) as mobile phase at a flow rate of 0.25 mL min<sup>-1</sup>. TGs were analyzed by using a modified version of reversed phase HPLC/ESI/MS with d5-TG 48:0 (CDN isotopes) as internal standard [22]. Cholesterol esters were analyzed with corresponding d6-C18 cholesterol ester (CDN isotopes) as internal standards [23]. The unsaturation index from the LC-MS data were computed by the ratio of the absolute concentration of all unsaturated lipids to the concentration of saturated lipids. Triglycerides with no double bonds were defined as saturated, with 1 to 3 saturations as mono-unsaturated (considering up to one double bond for each fatty acyl chain) and more than 3 double bonds as poly-unsaturated. Two unsaturation indices were derived considering either all unsaturated fatty acids (mono- and poly-unsaturated,  $n \geq 1$ ) or only the poly-unsaturated ones ( $n > 3$ ).

### mRNA Analysis

Total RNA was extracted from the liver samples using trizol reagent (Invitrogen) and treated with DNase I prior to cDNA conversion using the revertAid H minus first strand cDNA synthesis kit (Fermentas, USA) with oligo d(T) 18 primer according to manufacturer's instructions. For real time qPCR, cDNA samples were analyzed in triplicates using the SYBR Green PCR Master Mix reagent kit (Applied Biosystems) on a StepOnePlus Real-Time PCR System (Applied Biosystems). Relative mRNA levels were calculated and normalized to glyceraldehyde 3-phosphate dehydrogenase GAPDH (CAAGGT-CATCCATGACAACCTTTG) and (GGCCATCCACAGTCTT-CTGA), used as an endogenous control gene. The primer sequences used were as follows: peroxisome-proliferator-activated receptor  $\alpha$ ; PPAR $\alpha$  (TGTCATCACAGACACCCTCTCTC) and (TCATCTGTACTGGTGGGGACA), sterol regulatory element binding factor; SREBF1 (CTGCTTTGGAACCTCGTCCG) and (GCCTCCTGTGTACTTGCCCAT), stearoyl-CoA desaturase 1; SCD1 (CCTACGACAAGAACATTCATCTC) and (TTGATGTGCCAGCGGTACTCACTG). Fatty acid translocase; CD36 (Rn02115479\_g1), mitochondrial uncoupling protein 2; UCP2 (Rn01754856\_m1) (Taqman, Life Technologies, CA, USA).

### Histology

Rat liver sections were stained for Oil Red O and hematoxylin & eosin (H & E) to assess the fat accumulation and hepatocyte inflammation, respectively. After the terminal study the livers were excised and fixed in 10% formalin for 24 h and embedded in paraffin wax after dehydration. Formalin fixed rat livers were sectioned at 8  $\mu$ m and slides were rinsed with PBS (pH 7.4). After passing dry air, the slides were placed in 100% propylene glycol for 2 min, and stained in 0.5% Oil Red O solution in propylene glycol for 30 min. The slides were transferred to a 85% propylene glycol solution for 1 min, rinsed in distilled water for 2 times and processed for hematoxylin counter staining. The steatosis/steatohepatitis was evaluated using a semi-quantitative scoring system [24]. The scoring was based on a chow diet group of animals for which if liver acini did not show lipid vacuoles, a score of zero was given (baseline). Acini having lipid vacuoles up to 33% (mainly macrovesicular type) were considered as score 1. Acini with 34–66% of lipid vacuoles were scored 2 while acini having over 66% of lipid vacuoles were ranked 3.

### Data Analysis and Statistics

Spectroscopic data were processed and analyzed using the LCmodel software [25]. Lipid concentrations for both chow diet and HFD groups were estimated by fitting the resonances of methyl, n-methylene, allylic methylene, and the unsuppressed water signal. The results are expressed as the mean  $\pm$  s.e.m. (standard error of the mean). Statistical analysis was performed by MedCalc, with significant differences between means identified using paired two-tailed t-test. Differences were considered significant at  $P < 0.05$ .

Unsupervised multivariate factor analysis was performed using principal component analysis (PCA) (Unscrambler 10.2 software) on all quantitative data measured through LC-MS techniques. The PCA results are represented in terms of scores and correlation loadings plots. These scores and correlation loading vectors provide a concise and simplified description of the variance hidden in the dataset [26,27]. In the current PCA model the term 'explained validation variance' (EVV), expressed in percentage, is defined as the proportion of the variance in the data explained by the model.

## Results

### Bodyweight and Biochemical Measurements

HFD fed animals gained significant body weight during the 9<sup>th</sup> and 10<sup>th</sup> weeks. The average body weight of HFD group at the 12<sup>th</sup>, 18<sup>th</sup> and 24<sup>th</sup> week was significantly ( $P < 0.001$ ) higher than chow diet group (Table 1). The relative increase in percentage body weight of HFD rats at 12, 18 and 24 weeks were 20%, 35% and 42% higher than the chow diet rats respectively. Blood plasma glucose, insulin, total cholesterol and TG measured in HFD and chow diet groups of rats are listed in Table 1. The total TGs ( $P \leq 0.002$ ) and cholesterol content ( $P \leq 0.001$ ) of HFD animals were significantly higher than the chow diet fed animals for all measurements. The plasma glucose and insulin concentrations after OGTT performed at 18 weeks are shown in Figure 1A and B, respectively. Plasma glucose and insulin concentrations calculated by the area under the curve from 0–120 mins were significantly ( $P < 0.001$ ) higher in HFD fed rats compared to chow diet fed rats. Plasma glucose and insulin concentration from 0–120 mins for HFD rats was 29108 mg/dL and 876 mg/dL compared to 22607 mg/dL and 296 mg/dL in chow diet fed rats respectively. The plasma glucose and insulin concentrations of HFD rats at the 12<sup>th</sup>, 18<sup>th</sup> and 24<sup>th</sup> weeks were significantly higher ( $P < 0.001$ ) than chow diet fed rats (Table 1).

### Magnetic Resonance Spectroscopy

The liver fat was measured longitudinally in chow diet and HFD fed animals at the 12<sup>th</sup>, 18<sup>th</sup> and 24<sup>th</sup> weeks of age. Most of the lipid resonances are well resolved at 7 T compared to lower field magnets. The representative *in vivo* spectra obtained from both HFD and chow diet fed rats are shown in Figure S1A and B. The signals from methyl (0.9 ppm), n-methylene (1.30 ppm), allylic methylene (2.06 ppm),  $\alpha$ -methylene (2.20 ppm) and olefinic (5.30 ppm) groups are assigned in the spectra. Figure 2A shows the liver fat content of chow diet and HFD fed rats for different age groups. Total liver fat contents of the HFD and chow diet fed animals at 12 weeks were  $15.18 \pm 1.47\%$  and  $2.11 \pm 0.12\%$ , respectively. At 18 weeks the fat content in HFD animals increased to  $18.14 \pm 0.91\%$  compared to the chow diet group  $2.55 \pm 0.23\%$ . At 24 weeks the liver fat content increased to  $20.97 \pm 1.71\%$  and  $3.29 \pm 0.13\%$  for the HFD and chow diet animals, respectively. The liver fat content was significantly ( $P < 0.001$ ) higher in HFD animals compared to the chow diet

**Table 1.** Biochemical and body weight measurements of chow diet and HFD fed rats.

| Biochemical measurements | Chow diet animals     |                       |                       | High fat diet animals* |                       |                       |
|--------------------------|-----------------------|-----------------------|-----------------------|------------------------|-----------------------|-----------------------|
|                          | 12 <sup>th</sup> week | 18 <sup>th</sup> week | 24 <sup>th</sup> week | 12 <sup>th</sup> week  | 18 <sup>th</sup> week | 24 <sup>th</sup> week |
| Cholesterol (mg/dL)      | 46.24                 | 49.06                 | 53.64                 | 119.50                 | 133.37                | 151.63                |
| Triglyceride (mg/dL)     | 78.54                 | 82.65                 | 85.97                 | 401.74                 | 423.61                | 469.94                |
| Glucose (mg/dL)          | 102                   | 115                   | 122                   | 136                    | 148                   | 164                   |
| Insulin (ng/mL)          | 1.14                  | 1.31                  | 1.40                  | 4.26                   | 4.71                  | 5.21                  |
| Body weight (gm)         | 231                   | 274                   | 342                   | 278                    | 371                   | 487                   |

The blood plasma cholesterol, triglycerides, glucose, insulin and body weight were significantly ( $P<0.05$ ).

\* higher in HFD fed rats.

doi:10.1371/journal.pone.0091436.t001

group for all time points in the study. The liver fat of HFD fed animals increased significantly with age from 12 to 18 to 24 weeks. Figure 2B shows the unsaturation indices (UI) of chow diet and HFD animals at different ages. The UI of chow diet fed animals was always higher than the HFD fed group at all ages ( $P<0.005$ ).

### *In vitro* LC-MS Studies

The liver was harvested after the terminal *in vivo* study at 24 weeks and tissue samples were subjected to LC-MS analysis. The mean TG content in HFD animals (Figure 3A) was  $1983\pm356$  nmol/mL while it was significantly lower ( $511\pm221$  nmol/mL,  $P<0.001$ ) for the chow diet group. Figure 3B and C show the two unsaturation indices of HFD and chow diet groups determined by considering as unsaturated FAs either from  $n\geq 1$  or from  $n>3$ , respectively (both definitions given in the materials and methods section). The unsaturation index for the chow diet fed animals was significantly higher ( $P<0.002$ ) when considering the poly-unsaturated fatty acids for its calculation.

Figure 4 shows the saturated and unsaturated TGs in HFD and chow diet groups. Individual concentrations are provided in Table S1. The triglycerides 50:2, 50:1, 52:3, 52:2 and 52:1 were found to be the most abundant ( $120.99$  to  $273.60$  nmol/mL) and significantly higher ( $P<0.05$ ) in HFD rats than in the chow diet fed group. Concentrations of the triglycerides 48:2, 48:1, 50:3, 54:2, 54:3 were in the range  $56.73$  to  $85.44$  nmol/mL in HFD rats. The

rest of the TG concentrations were in the lower range of  $0.8$  to  $33.01$  nmol/mL but were still higher in HFD rats compared to chow diet fed rats ( $P<0.05$ ). In chow diet group of animals the concentrations of all the saturated TGs were in the lower range of  $0.1$  to  $<50$  nmol/mL. The unsaturated TGs including 50:4, 52:5, 52:4, 54:5, 54:4, and 57:4 with concentration in the range  $5$  to  $102$  nmol/mL in HFD rats were significantly ( $P<0.05$ ) higher than chow diet fed rats. However, the poly-unsaturated triglycerides 54:7, 56:8, 56:7, 58:11, 58:10, 58:9, 58:8 and 60:10 were significantly higher ( $P<0.05$ ) in chow diet fed rats than in HFD rats.

In addition to the TGs, we also estimated the concentration of phospholipids [PC, PE, PI, PG, PS, PA] and sphingolipids [SM, Cer, GluCer, GM3]. Both chow diet and HFD fed groups exhibit a similar concentration for each of the molecule studied (Figure S2A and B), except for lysophospholipids (LPC and LPE, Table 2). Total LPC levels, as well as the LPCs 18:1, 18:0 and 20:0 and LPEs 16:0, 18:1 and 18:0 were significantly ( $P<0.05$ ) higher in HFD rats (Table 2). Cholesterol ester (CE) content evaluated using LC-MS in HFD animals was higher  $226\pm50$  nmol/mL than chow diet group  $15\pm2$  nmol/mL ( $P<0.001$ ).

The PCA was performed on LC-MS data. The model optimally fitted the data with 96% and 3% of the total variance explained on PC1 and PC2, respectively. The PCA score plot (figure not shown) of the quantitative LC-MS data showed well delineated clusters of HFD and chow diet fed rats in the multidimensional space. The

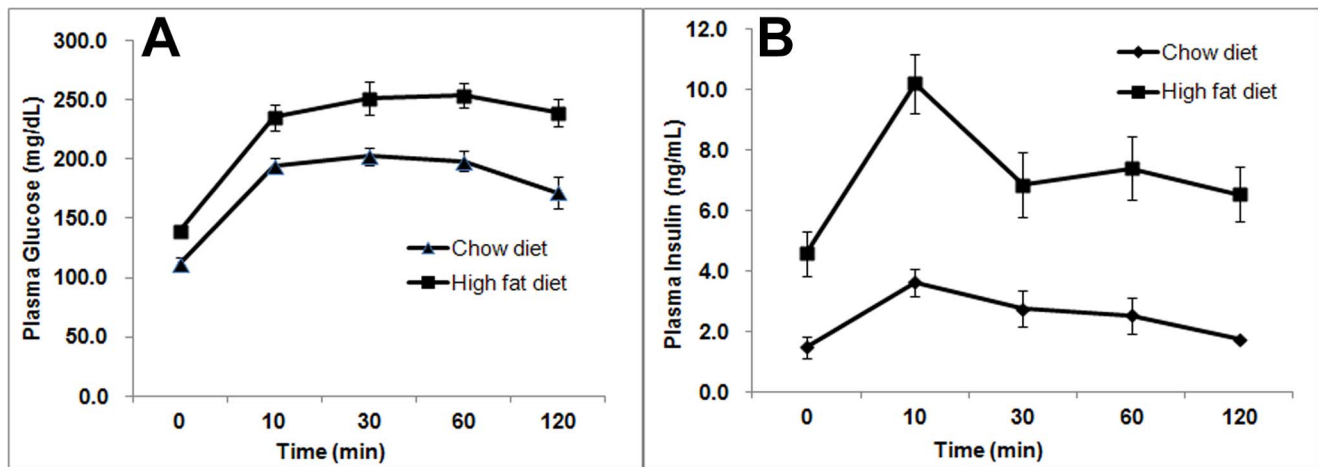

**Figure 1. OGTT measurements.** Time course of oral glucose tolerance test measurements from (A) plasma glucose and (B) plasma insulin for chow diet and HFD fed rats.

doi:10.1371/journal.pone.0091436.g001

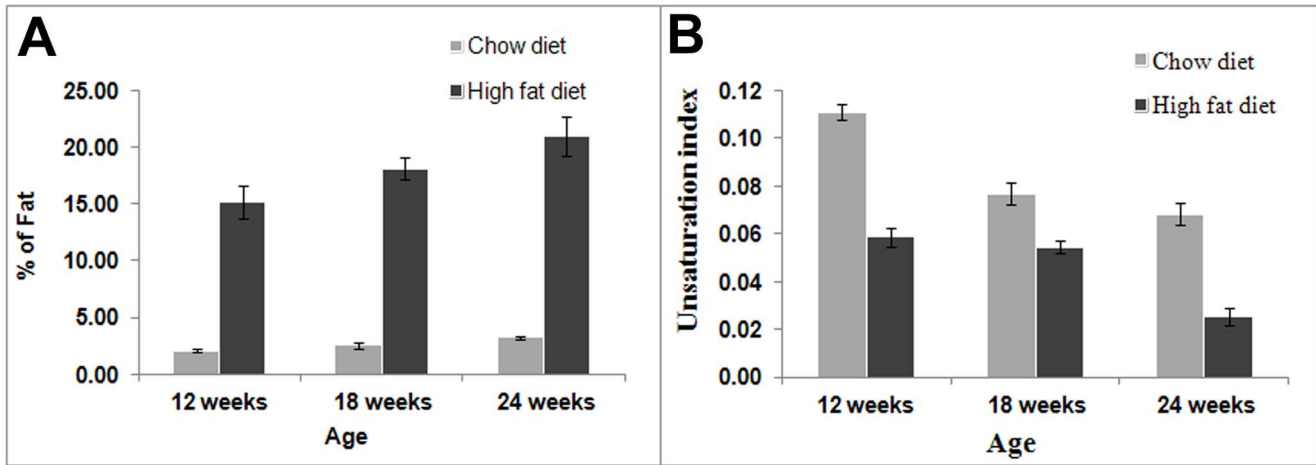

**Figure 2. Liver fat and unsaturation indices estimated by *in vivo* MRS.** Estimation of (A) liver fat (%) and (B) unsaturation indices by *in vivo* MRS from chow diet and high fat diet fed animals at the 12<sup>th</sup>, 18<sup>th</sup> and 24<sup>th</sup> weeks. Liver fat content was significantly ( $P < 0.001$ ) higher in HFD fed rats and unsaturation indices were significantly ( $P < 0.005$ ) higher in chow diet fed rats for all age groups. doi:10.1371/journal.pone.0091436.g002

loading plot (Figure S3) highlighted those key metabolites which were predominantly accounted for variability along PC1 and PC2 vectors. The PCA isolated the unsaturated TGs 52:2, 52:3, 52:1, 54:2, 50:2, 50:1, 48:2, 48:1, 50:3, 54:3 on PC1 axis and were present in higher concentrations.

**mRNA Analysis**

The real-time PCR mRNA expression analysis of various genes for both chow diet and HFD rats are shown in Figure 5. We found an increased expression ( $P < 0.05$ ) of mRNA levels of fatty acid translocase (CD36: 9 fold), peroxisome-proliferator-activated receptor  $\alpha$  (PPAR $\alpha$ : 2.35 fold), sterol regulatory element binding factor (SREBF1: 2.40 fold), stearoyl-CoA desaturase 1 (SCD1: 2.20 fold), mitochondrial uncoupling protein 2 (UCP2: 4.17 fold) in the HFD animal livers.

**Histopathologic Assessment of Hepatic Steatosis**

Representative H & E and Oil Red O stained sections of 24 weeks old rat liver from HFD and chow diet animals are shown in Figure 6A and B, respectively. The fat deposition (lipid droplets) in stained sections of the HFD fed animals is of mixed type including macrovesicular type where in either single large fat droplet

displacing the nucleus or the presence of smaller well-defined intracytoplasmic droplets. Based on the scoring method [24], the HFD fed animals showed histopathological features of hepatic steatosis with a score of 3 indicating over 68% of acini were occupied by lipid vacuoles compared to chow diet fed animals. Accumulation of lipid vacuoles was of both macro- and micro-vesicular patterns. There were clear, well delineated and the cytoplasmic vacuoles in the hepatocytes were of variable sizes with mainly midzonal and paracentral distributions. There were  $68 \pm 1.08\%$  lipid vacuoles in the liver of HFD rats compared to  $4.59 \pm 1.54\%$  only for the chow diet group. HFD animals displayed histopathological features of hepatic steatosis.

**Discussion**

Dietary intake of high amounts of saturated FAs and low amounts of polyunsaturated fatty acids can cause NAFLD [28]. In this study, we investigated the longitudinal changes of lipid composition in a high saturated fat diet fed rodent model using *in vivo* MRS and LC-MS techniques.

Our HFD model showed significant weight gain starting at the 9<sup>th</sup> week. The blood plasma analysis of the HFD animals showed hyperinsulinemia and hypertriglyceridemia confirming insulin-

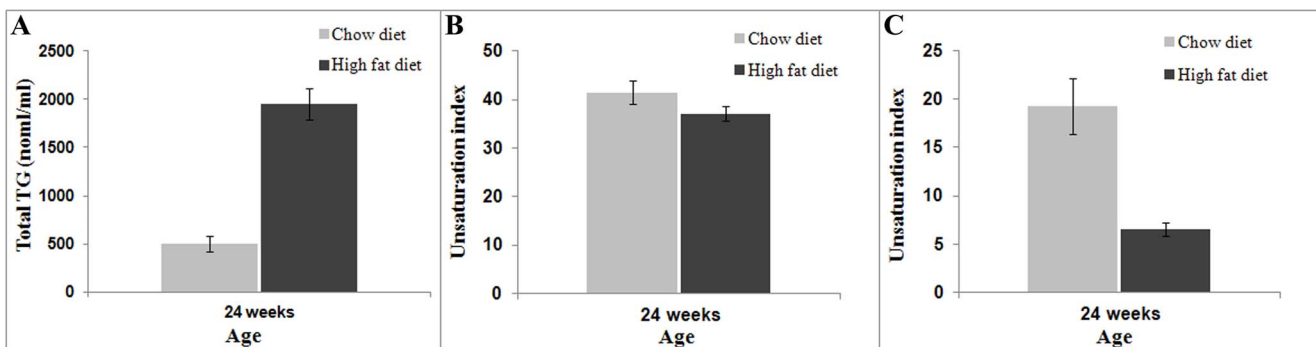

**Figure 3. Triglycerides and unsaturation indices estimated from LC-MS.** Estimation of (A) total triglycerides (B) unsaturation indices (by considering unsaturated FAs with  $n \geq 1$ ) and (C) unsaturation indices (by considering unsaturated FAs with  $n > 3$ ) at 24 weeks in high fat diet and chow diet fed rats. doi:10.1371/journal.pone.0091436.g003

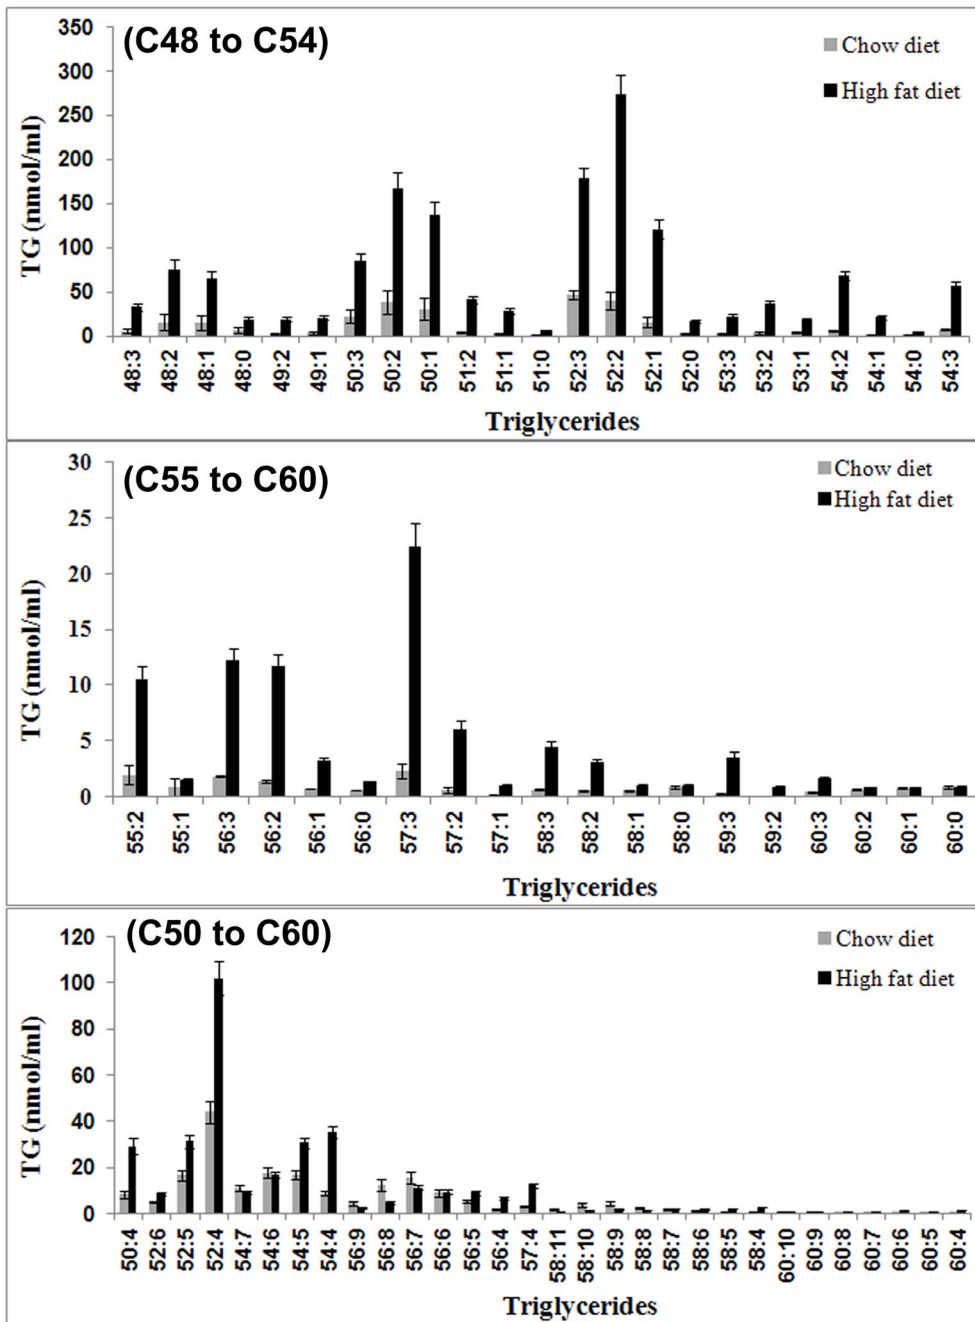

**Figure 4. Saturated and unsaturated triglycerides by LC-MS.** Concentrations of saturated and unsaturated TGs in HFD and chow diet fed rats estimated by LC-MS at 24 weeks. Triglycerides C50:2, C50:1, C52:3, C52:2 and C52:1 were found to be most abundant (>100 nmol/ml) and significantly higher in HFD fed rats compared to chow diet fed rats. Concentrations of other TGs were less than 100 nmol/ml but significantly higher in HFD rats. doi:10.1371/journal.pone.0091436.g004

resistant conditions [29,30]. High saturated fat diet intervention resulted in an increase of body weight, increase in triglycerides and cholesterol which lead to the metabolic consequence of insulin resistance from the 12<sup>th</sup> week. The liver fat of HFD groups as assessed by MRS, was higher by 13–17% compared to the respective chow diet groups. This was confirmed by measuring the liver TG content by LC-MS and also on histology. Histology results from HFD fed rats showed excessive accumulation of triglycerides with 68% of lipid vacuoles occupying the hepatocytes at 24 weeks. The 9-fold increase in CD36 mRNA expression in

HFD rat livers suggested enhanced fatty acid transport in the fatty liver resulting in an increased demand for the oxidation of fatty acids. Hepatic PPAR $\alpha$  associated with the attenuation of insulin signaling and hepatic steatosis was upregulated by 2.35 fold in HFD rats. The SREBF1 was elevated 2.4 fold in HFD fed rats implicating the cause of insulin resistance and hepatosteatosis as confirmed by histology. Hepatic mitochondrial oxidant production is one of the primary mechanisms that promotes oxidative stress during NAFLD, NASH and type 2 diabetes conditions [31,32]. UCP2 is mitochondrial inner membrane protein present in variety



**Table 2.** Concentrations of LPCs and LPEs in liver tissues of chow diet and HFD fed rats at 24 weeks.

| LPC and LPE | Chow diet ( $\mu\text{mol/ml}$ ) | HFD ( $\mu\text{mol/ml}$ )    | P value |
|-------------|----------------------------------|-------------------------------|---------|
| LPC18:0     | $0.0063 \pm 5 \times 10^{-4}$    | $0.008 \pm 6 \times 10^{-4}$  | 0.005   |
| LPC18:1     | $0.0012 \pm 6 \times 10^{-5}$    | $0.0023 \pm 2 \times 10^{-4}$ | <0.005  |
| LPC20:0     | $0.0027 \pm 2 \times 10^{-4}$    | $0.004 \pm 5 \times 10^{-4}$  | <0.04   |
| LPE16:0     | $0.0147 \pm 1 \times 10^{-3}$    | $0.0184 \pm 7 \times 10^{-4}$ | <0.005  |
| LPE18:1     | $0.0023 \pm 9 \times 10^{-5}$    | $0.0048 \pm 5 \times 10^{-4}$ | <0.001  |
| LPE18:0     | $0.010 \pm 6 \times 10^{-4}$     | $0.017 \pm 9 \times 10^{-4}$  | 0.001   |

Concentrations of lysophosphatidylcholines (LPC) and lysophosphatidylethanolamines (LPE) were significantly higher in liver tissues of HFD fed rats.

doi:10.1371/journal.pone.0091436.t002

of tissues including liver (hepatocytes) and its main function involves the control of mitochondria-derived oxidant production [33,34,35]. Studies on different tissues of animal models confirmed that the baseline expression of UCP2 gene in hepatocytes is undetectable but it shows significant up-regulation in the liver during pathologic conditions associated with steatosis [34]. The 4-fold increased expression of UCP2 levels in HFD group supported the involvement of UCP2 gene in the pathogenesis of NAFLD.

In addition, we showed that the FA composition of the liver is altered by HFD feeding. The unsaturation indices as determined by *in vivo* MRS at 12, 18 and 24 weeks and by LC-MS at 24 weeks were significantly lower in HFD rats. The UIs estimated by MRS using resonances of olefinic, methyl, methylene and allylic methylene at 24 weeks showed a 2.6 fold increase in chow diet fed rats. The UIs estimated by LC MS were 1.12 and 2.9 fold higher in chow diet fed rats when considering both mono- and poly-unsaturated FA and only polyunsaturated fatty acids, respectively. This 2.9 fold higher UI obtained by calculating only

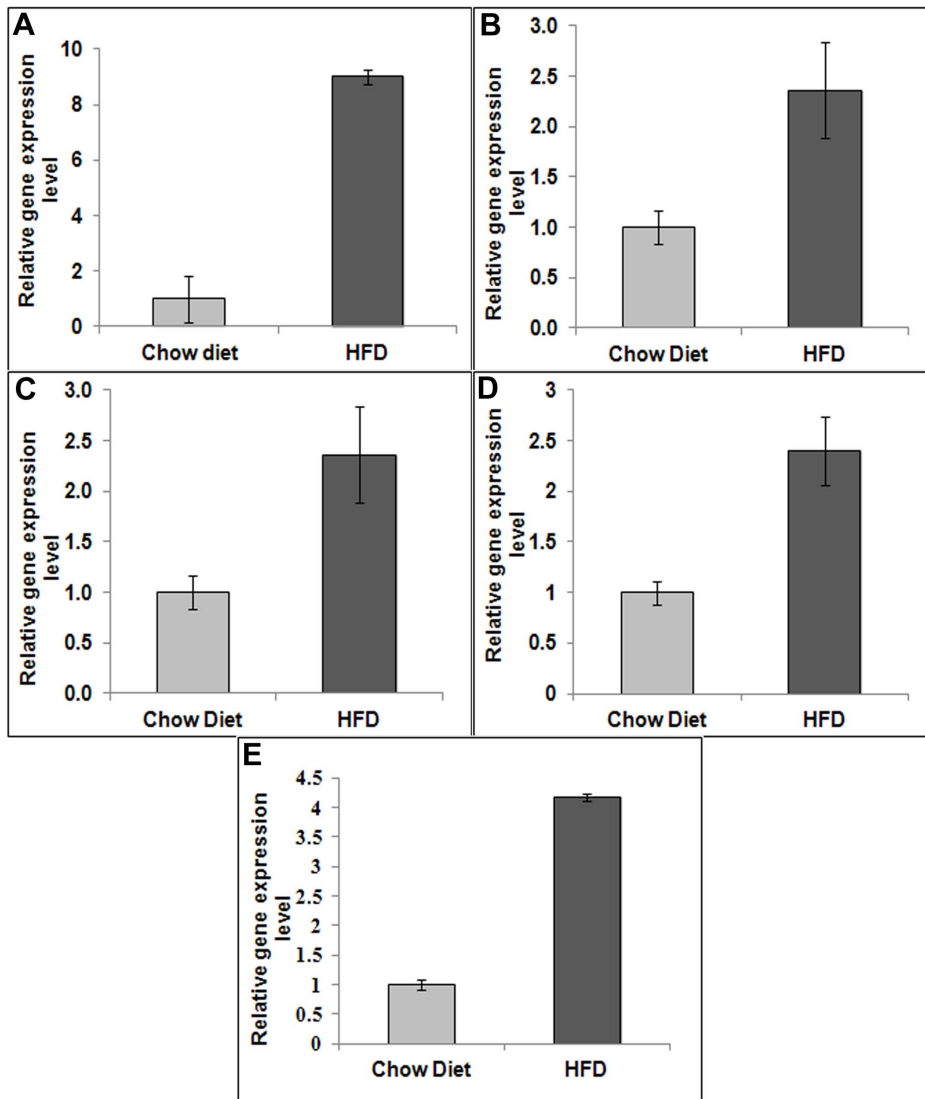

**Figure 5. mRNA expression analysis.** mRNA expression of (A) CD36, (B) SREBF1, (C) PPAR $\alpha$ , (D) SCD1, and (E) UCP2. The expression of all these genes were significantly higher for HFD rats than for chow diet fed animals.  
doi:10.1371/journal.pone.0091436.g005

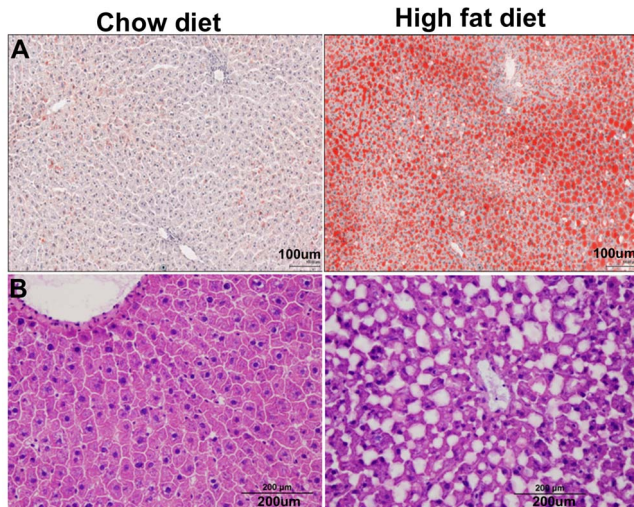

**Figure 6. Liver histology.** (A) Oil red O staining and (B) Hematoxylin-eosin staining of HFD and chow diet fed rat liver tissues at 24 weeks. The HFD fed rats showed histopathological features of hepatic steatosis with a score of 3 indicating over 68% of acini occupied by lipid vacuoles compared to chow diet fed rats. doi:10.1371/journal.pone.0091436.g006

polyunsaturated fatty acids is comparable with the MRS result (2.6 fold). The *in vivo* MRS and *in vitro* LC-MS techniques provided complimentary information and had a good agreement for the estimation of unsaturation in chow diet and HFD fed groups. Both methods demonstrated decreased unsaturation in HFD rats compared to chow diet rats. The accuracy of estimating the unsaturation by 1D MR methods can be improved by including bi-allylic methylene (2.8 ppm) signal which is not well resolved. Localized 2D L-COSY technique [36] provides improved spectral resolution where  $\tilde{J}$  coupled multiplet resonances are dispersed over two spectral dimensions. The L-COSY techniques has been utilized to estimate unsaturation using the cross peaks generated by the scalar couplings between olefinic and allylic, diallylic methylene protons [37] in skeletal muscle. This technology can be further developed for liver applications with appropriate motion compensation and optimization of acquisition time within a clinical setting.

The decrease in unsaturation in the HFD group might be due to alteration in fatty acid composition because of changes in desaturase expression or activities. Donnelly et al. have shown that dietary fatty acids contribute to the fatty acid pool in the liver [17]. As such, the high proportion of saturated fat and decreased availability of polyunsaturated lipid components in the HFD contributed to the low unsaturation index. Degree of unsaturation can be influenced by the activity of desaturases. SCD1 catalyzes the conversion of the saturated fatty acyl-CoAs, to their respective monounsaturated fatty acyl CoAs. The SCD1 was up regulated in the livers of HFD mice by 2.2 fold. SCD1 up regulation contributed to increase in monounsaturated fatty acids (Table S1). In spite of increased mono-unsaturation, the proportion of the available saturated fatty acids was still abundant in the HFD group resulting in lower unsaturation index. The upregulation of SCD1 in HFD rats confirmed its crucial role in the pathogenesis of diet-induced hepatic insulin resistance [38]. It was established that rate-limiting nature of desaturation enzymes contribute to the development of the diabetic condition [39]. A reduced degree of unsaturation was reported in the skeletal muscle of overweight and obese subjects [40]. Earlier MRS studies showed the changes in

degree of unsaturation in skeletal muscle of normal, overweight and obese human subjects [16] and bone marrow composition in osteoporosis subjects [19]. Relatively high levels of saturated fatty acids and low levels of polyunsaturated fatty acids are found in individuals with insulin resistance and metabolic syndrome [41]. Our study suggested that the same phenomenon was observed in the liver of rats fed with a HFD and may also be relevant to the pathogenesis of NAFLD and insulin resistance associated with high fat feeding.

We also noticed a decreasing trend of FA unsaturation in chow diet fed rats over the age which might be due to the redistribution of the fatty acid composition. It was shown that ageing can alter liver mitochondrial membranes influencing the free radical production and reduce unsaturation [42]. During ageing there is a redistribution between types of unsaturated fatty acids resulting in transition from highly unsaturated fatty acids to less unsaturated fatty acids [43]. In addition, it was found that impairment in activity of delta-6-desaturase (D6D) due to ageing process results in decreased synthesis of n-6 and n-3 polyunsaturated fatty acids which is also a contributing factor in reducing the unsaturation index over time [44].

The multivariate analysis showed the triglycerides (52:2, 52:3, 52:1, 54:2, 50:2, 50:1, 48:2, 48:0, 48:1, 50:3, 54:3) accounted for increased fat in the liver. Rhee et al. [45] showed that triglycerides 48:0, 48:1 and 52:1 in human plasma of diabetic individuals are associated with increased risk of diabetes mellitus. Our current results suggests that the accumulation of these fatty acids in liver tissues of HFD fed rats may also be important in increasing the risk of diabetes mellitus. Cholesterol ester hydrolase (CEH) plays a vital role in hepatic cholesterol homeostasis and its activity is proportional to production of cholesterol ester. Three fold higher CEH activity was reported in patients with acute hepatitis compared to normal livers [46,47]. In the present study the excessive accumulation of cholesterol ester in HFD rats confirmed the steatosis condition of the liver indicating the risk of hepatitis. Increased incorporation of saturated fat and cholesterol into the cell membranes increase the membrane rigidity thereby reducing the number of insulin receptors and their affinity to insulin, causing an insulin resistance in the local tissue. This increased availability of hepatic saturated fatty acids in HFD fed animals reduces hepatic fatty acid oxidation and triglyceride export. This in turn would increase hepatic fatty acid and triglyceride synthesis which would augment the triglyceride accumulation in the liver of HFD fed animals. LPC is an important signaling molecule with diverse biological functions and involved in regulating cellular inflammation [48,49]. Plasma, liver and skeletal muscle LPC levels are increased in the obese diabetic db/db mouse and these findings support that LPC may be involved in mediating insulin resistance in obesity [50]. Increased abundance of LPCs was shown to induce hepatocellular death caused by mitochondrial membrane depolarization [51,52].

The HFD fed rat livers showed increased concentration of lysophospholipids (LPC and LPE). In particular, excessive accumulation of LPC 18:1, 18:0, 20:0 and LPE 16:0, 18:0, 18:1 in HFD fed rats might be due to liver inflammation indicating the increased risk of diabetes [53]. Production of these lysophospholipids *in vivo* is usually mediated by the release and/or activation of the enzyme phospholipase A2 (PLA2) under inflammatory conditions. PLA2 is present in neutrophilic granulocytes and its activation under inflammatory condition is also associated with generation of reactive oxygen species. In a recent clinical study, the LPE and LPCs were significantly higher in inflammatory livers compared to healthy liver as confirmed by  $^{31}\text{P}$  MRS [54].



In conclusion, HFD increased the total fat fraction, and altered the fatty acid composition which might be due to the composition of the diet, or alterations in desaturase enzymes. The change in unsaturation is relevant to the pathogenesis of NAFLD and insulin resistance. Perturbations in lysophospholipids (LPC and LPE) might provide early information on oxidative stress/inflammation in NAFLD before the incidence of diabetes. These markers may be useful to study the link between a HFD and medical conditions in humans. Further studies are required to explore the possibilities of using unsaturation index in scaling the severity of the NAFLD in clinical practice. These studies could be extrapolated to evaluate the metabolic response during interventions including exercise and drugs.

## Supporting Information

**Figure S1 *In vivo* liver spectra from HFD and chow diet fed rats.** Representative *in-vivo* liver spectra from (A) HFD and (B) chow diet fed rats. The signals from methyl (0.9 ppm), *n*-methylene (1.30 ppm), allylic methylene (2.06 ppm),  $\alpha$ -methylene (2.20 ppm) and olefinic (5.3 ppm) groups are assigned in the spectra. (TIF)

**Figure S2 Concentration of phospholipids and sphingolipids from HFD and chow diet fed rats.** A. Concentrations of sphingomyelin (SM), ceramide (Cer), phosphatidylcho-

line (PC), phosphatidylethanolamine (PE), phosphatidylinositol (PI), phosphatidylserine (PS), B. Glucosyl-ceramide (GluCer), phosphatidic acids (PA), phosphatidylglycerol (PG), gangliosides mannoside 3(GM3) in HFD and chow diet fed rats. (TIF)

**Figure S3 Multivariate analysis of lipid components.** Multivariate analysis of lipid components in HFD and chow diet fed rats. Loading plot highlighted the key TGs contributing to the maximum variance between the two groups. (TIF)

**Table S1 Concentrations of saturated and unsaturated triglycerides.** Concentrations of saturated and unsaturated triglycerides in liver of chow diet and HFD fed rats at 24 weeks (DOCX)

## Acknowledgments

We thank Drs. Guilhem Pages and Karthikeyan Narayanan for discussions.

## Author Contributions

Conceived and designed the experiments: SSV MRW EST CJH SS. Performed the experiments: JY VG OWK GS BDL. Analyzed the data: JY VG OWK GS BDL. Contributed reagents/materials/analysis tools: SSV MRW. Wrote the paper: JY EST MRW SSV.

## References

- Seppala-Lindroos A, Vehkavaara S, Hakkinen AM, Goto T, Westerbacka J, et al. (2002) Fat accumulation in the liver is associated with defects in insulin suppression of glucose production and serum free fatty acids independent of obesity in normal men. *J Clin Endocrinol Metab* 87: 3023–3028.
- Lakka HM, Laaksonen DE, Lakka TA, Niskanen LK, Kumpusalo E, et al. (2002) The metabolic syndrome and total and cardiovascular disease mortality in middle-aged men. *JAMA* 288: 2709–2716.
- Marchesini G, Brizi M, Morselli-Labate AM, Bianchi G, Bugianesi E, et al. (1999) Association of nonalcoholic fatty liver disease with insulin resistance. *Am J Med* 107: 450–455.
- Ikai E, Ishizaki M, Suzuki Y, Ishida M, Noborizaka Y, et al. (1995) Association between hepatic steatosis, insulin resistance and hyperinsulinaemia as related to hypertension in alcohol consumers and obese people. *J Hum Hypertens* 9: 101–105.
- Zavaroni I, Mazza S, Dall'Aglio E, Gasparini P, Passeri M, et al. (1992) Prevalence of hyperinsulinaemia in patients with high blood pressure. *J Intern Med* 231: 235–240.
- Dunn W, Xu R, Wingard DL, Rogers C, Angulo P, et al. (2008) Suspected nonalcoholic fatty liver disease and mortality risk in a population-based cohort study. *Am J Gastroenterol* 103: 2263–2271.
- Fabbrini E, deHaseth D, Deivanayagam S, Mohammed BS, Vitola BE, et al. (2009) Alterations in fatty acid kinetics in obese adolescents with increased intrahepatic triglyceride content. *Obesity (Silver Spring)* 17: 25–29.
- Manco M, Mingrone G, Greco AV, Capristo E, Gniuli D, et al. (2000) Insulin resistance directly correlates with increased saturated fatty acids in skeletal muscle triglycerides. *Metabolism* 49: 220–224.
- Goodpaster BH, Wolf D (2004) Skeletal muscle lipid accumulation in obesity, insulin resistance, and type 2 diabetes. *Pediatr Diabetes* 5: 219–226.
- Shoelson SE, Herrero L, Naaz A (2007) Obesity, inflammation, and insulin resistance. *Gastroenterology* 132: 2169–2180.
- Dorfman SE, Laurent D, Gounarides JS, Li X, Mullarkey TL, et al. (2009) Metabolic implications of dietary trans-fatty acids. *Obesity (Silver Spring)* 17: 1200–1207.
- Zivkovic AM, German JB, Sanyal AJ (2007) Comparative review of diets for the metabolic syndrome: implications for nonalcoholic fatty liver disease. *Am J Clin Nutr* 86: 285–300.
- Gaster M, Rustan AC, Beck-Nielsen H (2005) Differential utilization of saturated palmitate and unsaturated oleate: evidence from cultured myotubes. *Diabetes* 54: 648–656.
- Chavez JA, Knotts TA, Wang LP, Li G, Dobrowsky RT, et al. (2003) A role for ceramide, but not diacylglycerol, in the antagonism of insulin signal transduction by saturated fatty acids. *J Biol Chem* 278: 10297–10303.
- Chavez JA, Summers SA (2003) Characterizing the effects of saturated fatty acids on insulin signaling and ceramide and diacylglycerol accumulation in 3T3-L1 adipocytes and C2C12 myotubes. *Arch Biochem Biophys* 419: 101–109.
- Vessby B, Gustafsson IB, Tengblad S, Boberg M, Andersson A (2002) Desaturation and elongation of Fatty acids and insulin action. *Ann N Y Acad Sci* 967: 183–195.
- Donnelly KL, Smith CI, Schwarzenberg SJ, Jessurun J, Boldt MD, et al. (2005) Sources of fatty acids stored in liver and secreted via lipoproteins in patients with nonalcoholic fatty liver disease. *J Clin Invest* 115: 1343–1351.
- Nagarajan V, Gopalan V, Kaneko M, Angeli V, Gluckman P, et al. (2013) Cardiac function and lipid distribution in rats fed a high-fat diet: *in vivo* magnetic resonance imaging and spectroscopy. *Am J Physiol Heart Circ Physiol* 304: H1495–1504.
- Yeung DK, Griffith JF, Antonio GE, Lee FK, Woo J, et al. (2005) Osteoporosis is associated with increased marrow fat content and decreased marrow fat unsaturation: a proton MR spectroscopy study. *J Magn Reson Imaging* 22: 279–285.
- Shui G, Stebbins JW, Lam BD, Cheong WF, Lam SM, et al. (2011) Comparative plasma lipidome between human and cynomolgus monkey: are plasma polar lipids good biomarkers for diabetic monkeys? *PLoS ONE* 6: e19731.
- Shui G, Lam SM, Stebbins J, Kusunoki J, Duan X, et al. (2013) Polar lipid derangements in type 2 diabetes mellitus: potential pathological relevance of fatty acyl heterogeneity in sphingolipids. *Metabolomics* 9: 786–799.
- Shui G, Guan XL, Low CP, Chua GH, Goh JS, et al. (2010) Toward one step analysis of cellular lipidomes using liquid chromatography coupled with mass spectrometry: application to *Saccharomyces cerevisiae* and *Schizosaccharomyces pombe* lipidomics. *Mol Biosyst* 6: 1008–1017.
- Shui G, Cheong WF, Jappara IA, Hoi A, Xue Y, et al. (2011) Derivatization-independent cholesterol analysis in crude lipid extracts by liquid chromatography/mass spectrometry: applications to a rabbit model for atherosclerosis. *J Chromatogr A* 1218: 4357–4365.
- Wei Y, Clark SE, Morris EM, Thyfault JP, Uptergrove GM, et al. (2008) Angiotensin II-induced non-alcoholic fatty liver disease is mediated by oxidative stress in transgenic TG(mRen2)27(Ren2) rats. *J Hepatol* 49: 417–428.
- Provencher SW (1993) Estimation of metabolite concentrations from localized *in vivo* proton NMR spectra. *Magn Reson Med* 30: 672–679.
- Pearson K (1901) On Lines and Planes of Closest Fit to Systems of Points in Space. *Philosophical Magazine* 2.
- Abdi H, W Lj (2010) Principal component analysis. *Wiley Interdisciplinary Reviews: Computational Statistics* 2.
- Musso G, Gambino R, De Michieli F, Cassader M, Rizzetto M, et al. (2003) Dietary habits and their relations to insulin resistance and postprandial lipemia in nonalcoholic steatohepatitis. *Hepatology* 37: 909–916.
- Pratchayasakul W, Kerdphoo S, Petsophonakul P, Pongchaidecha A, Chatipakorn N, et al. (2011) Effects of high-fat diet on insulin receptor function in rat hippocampus and the level of neuronal corticosterone. *Life Sci* 88: 619–627.

30. Pipatiboon N, Pratchayasakul W, Chattipakorn N, Chattipakorn SC (2012) PPARgamma agonist improves neuronal insulin receptor function in hippocampus and brain mitochondria function in rats with insulin resistance induced by long term high-fat diets. *Endocrinology* 153: 329–338.
31. Pessayre D (2007) Role of mitochondria in non-alcoholic fatty liver disease. *J Gastroenterol Hepatol* 22 Suppl 1: S20–27.
32. Mailloux RJ, Harper ME (2011) Uncoupling proteins and the control of mitochondrial reactive oxygen species production. *Free Radic Biol Med* 51: 1106–1115.
33. Fleury C, Neverova M, Collins S, Raimbault S, Champigny O, et al. (1997) Uncoupling protein-2: a novel gene linked to obesity and hyperinsulinemia. *Nat Genet* 15: 269–272.
34. Chavin KD, Yang S, Lin HZ, Chatham J, Chacko VP, et al. (1999) Obesity induces expression of uncoupling protein-2 in hepatocytes and promotes liver ATP depletion. *J Biol Chem* 274: 5692–5700.
35. Brand MD, Esteves TC (2005) Physiological functions of the mitochondrial uncoupling proteins UCP2 and UCP3. *Cell Metab* 2: 85–93.
36. Thomas MA, Yue K, Binesh N, Davanzo P, Kumar A, et al. (2001) Localized two-dimensional shift correlated MR spectroscopy of human brain. *Magn Reson Med* 46: 58–67.
37. Velan SS, Durst C, Lemieux SK, Raylman RR, Sridhar R, et al. (2007) Investigation of muscle lipid metabolism by localized one- and two-dimensional MRS techniques using a clinical 3T MRI/MRS scanner. *J Magn Reson Imaging* 25: 192–199.
38. Gutierrez-Juarez R, Poci A, Mulas C, Ono H, Bhanot S, et al. (2006) Critical role of stearoyl-CoA desaturase-1 (SCD1) in the onset of diet-induced hepatic insulin resistance. *J Clin Invest* 116: 1686–1695.
39. Horrobin DF (1993) Fatty acid metabolism in health and disease: the role of delta-6-desaturase. *Am J Clin Nutr* 57: 732S–736S; discussion 736S–737S.
40. Reznick AZ PL, Sen CK, Holloszy JO, Jackson MJ. (1998) Oxidative Stress in Skeletal Muscle: Basel: Birkhauser Verlag.
41. Velan SS, Said N, Durst C, Frisbee S, Frisbee J, et al. (2008) Distinct patterns of fat metabolism in skeletal muscle of normal-weight, overweight, and obese humans. *Am J Physiol Regul Integr Comp Physiol* 295: R1060–1065.
42. Pamplona R, Prat J, Cadenas S, Rojas C, Perez-Campo R, et al. (1996) Low fatty acid unsaturation protects against lipid peroxidation in liver mitochondria from long-lived species: the pigeon and human case. *Mech Ageing Dev* 86: 53–66.
43. Pamplona R, Portero-Otin M, Riba D, Requena JR, Thorpe SR, et al. (2000) Low fatty acid unsaturation: a mechanism for lowered lipoperoxidative modification of tissue proteins in mammalian species with long life spans. *J Gerontol A Biol Sci Med Sci* 55: B286–291.
44. Bordoni A, Hrelia S, Lorenzini A, Bergami R, Cabrini L, et al. (1998) Dual influence of aging and vitamin B6 deficiency on delta-6-desaturation of essential fatty acids in rat liver microsomes. *Prostaglandins Leukot Essent Fatty Acids* 58: 417–420.
45. Rhee EP, Cheng S, Larson MG, Walford GA, Lewis GD, et al. (2011) Lipid profiling identifies a triacylglycerol signature of insulin resistance and improves diabetes prediction in humans. *J Clin Invest* 121: 1402–1411.
46. Simon JB, Poon RW (1978) Hepatic cholesterol ester hydrolase in human liver disease. *Gastroenterology* 75: 470–473.
47. Simon JB, Poon RW (1978) Studies on human hepatic cholesterol ester hydrolase in liver disease. *Scand J Clin Lab Invest Suppl* 150: 218–222.
48. Xu Y (2002) Sphingosylphosphorylcholine and lysophosphatidylcholine: G protein-coupled receptors and receptor-mediated signal transduction. *Biochim Biophys Acta* 1582: 81–88.
49. Xu Y, Fang XJ, Casey G, Mills GB (1995) Lysophospholipids activate ovarian and breast cancer cells. *Biochem J* 309 (Pt 3): 933–940.
50. Han MS, Lim YM, Quan W, Kim JR, Chung KW, et al. (2011) Lysophosphatidylcholine as an effector of fatty acid-induced insulin resistance. *J Lipid Res* 52: 1234–1246.
51. Kalous M, Rauchova H, Drahota Z (1992) The effect of lysophosphatidylcholine on the activity of various mitochondrial enzymes. *Biochim Biophys Acta* 1098: 167–171.
52. Basanez G, Sharpe JC, Galanis J, Brandt TB, Hardwick JM, et al. (2002) Bax-type apoptotic proteins porate pure lipid bilayers through a mechanism sensitive to intrinsic monolayer curvature. *J Biol Chem* 277: 49360–49365.
53. Puri P, Baillie RA, Wiest MM, Mirshahi F, Choudhury J, et al. (2007) A lipidomic analysis of nonalcoholic fatty liver disease. *Hepatology* 46: 1081–1090.
54. Schober C, Schiller J, Pinker F, Hengstler JG, Fuchs B (2009) Lysophosphatidyl ethanolamine is - in contrast to - choline - generated under in vivo conditions exclusively by phospholipase A2 but not by hypochlorous acid. *Bioorg Chem* 37: 202–210.
